# Supplementary material
Source: PubMed Central journal article supplement (PMC10019900)

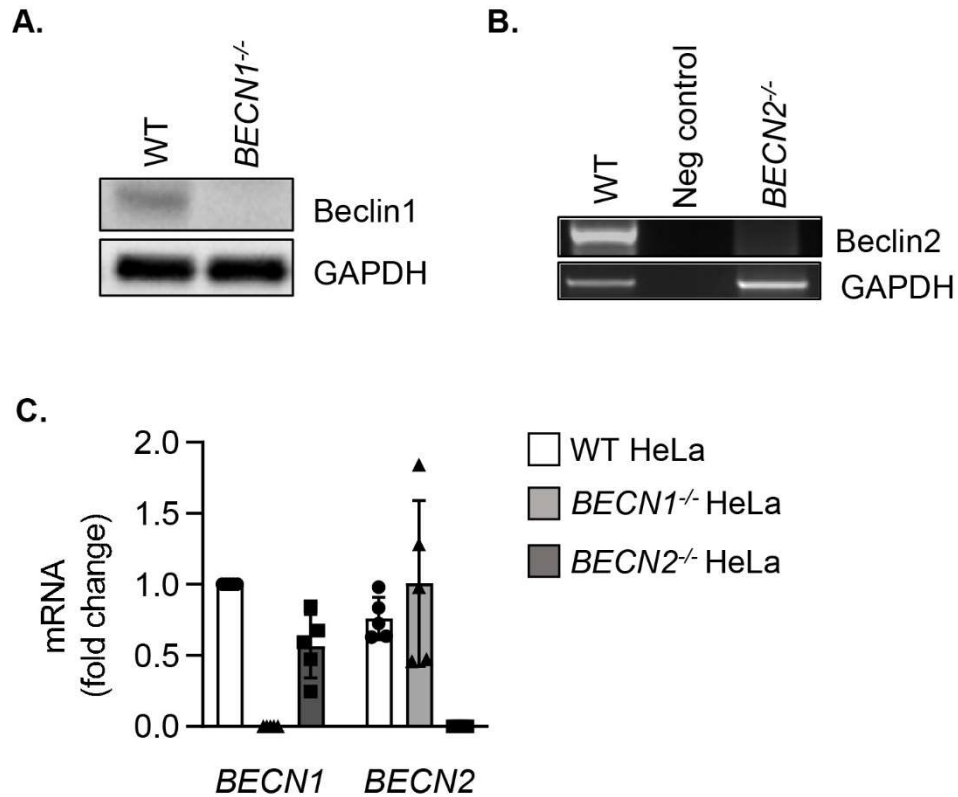

**Figure S1.** Generation of *BECN1*<sup>-/-</sup> and *BECN2*<sup>-/-</sup> HeLa cells using CRISPR-Cas-9. **A.** Representative Western blot for Beclin1 in WT and *BECN1*<sup>-/-</sup> HeLa cells. **B.** Ethidium bromide-stained agarose gel showing PCR-amplified *BECN2* transcripts in WT, negative control, and *BECN2*<sup>-/-</sup> HeLa cells. **C.** Quantitative PCR analysis of *BECN1* and *BECN2* transcript levels in WT, *BECN1*<sup>-/-</sup> and *BECN2*<sup>-/-</sup> HeLa cells (n=5 biological replicates per group).

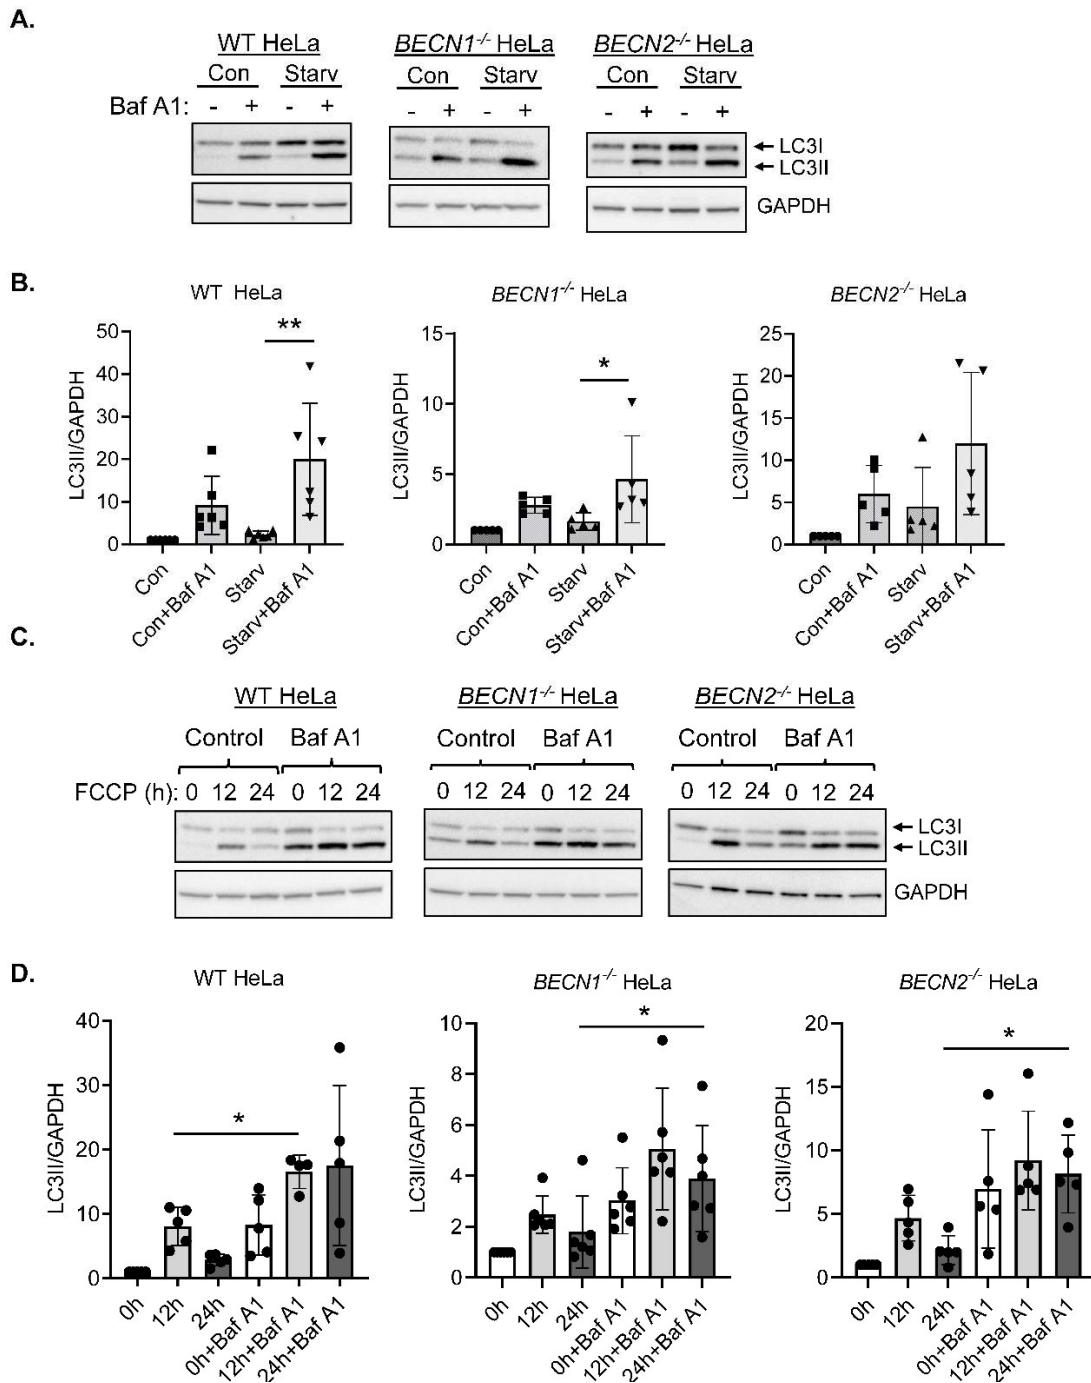

**Figure S2.** Evaluation of autophagic flux in WT, *BECN1*<sup>-/-</sup> and *BECN2*<sup>-/-</sup> HeLa cells. **A.** Representative Western blots of cells treated or not with Bafilomycin A1 (Baf A1, 3h). **B.** Quantification of LC3II protein levels in WT, *BECN1*<sup>-/-</sup> and *BECN2*<sup>-/-</sup> HeLa cells. **C.** Representative Western blots of cells treated with 10  $\mu$ M FCCP in the absence or presence of Baf A1. **D.** Quantification of LC3II protein levels in WT, *BECN1*<sup>-/-</sup> and *BECN2*<sup>-/-</sup> HeLa cells (n=5 biological replicates per group). \*p<0.05, \*\*p<0.01 by one-way ANOVA followed by Tukey's multiple comparison test.

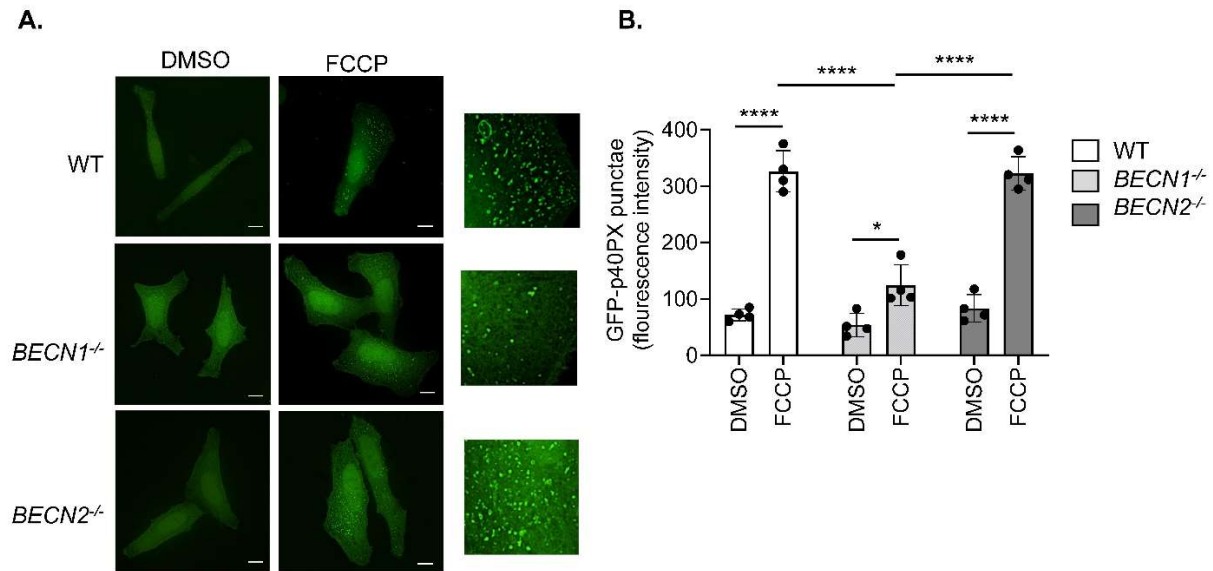

**Figure S3.** Vps34 activity in WT, *BECN1*<sup>-/-</sup> and *BECN2*<sup>-/-</sup> HeLa cells. **A.** Representative images of WT, *BECN1*<sup>-/-</sup> and *BECN2*<sup>-/-</sup> HeLa cells overexpressing the GFP-p40PX reporter before and after treatment with FCCP (10  $\mu$ M) for 6 h. **B.** Quantification of GFP-p40PX positive puncta in cells (n=120 cells/group from 4 independent experiments). \*p<0.05 and \*\*\*\*p<0.0001 by two-way ANOVA followed by Tukey's multiple comparison test.

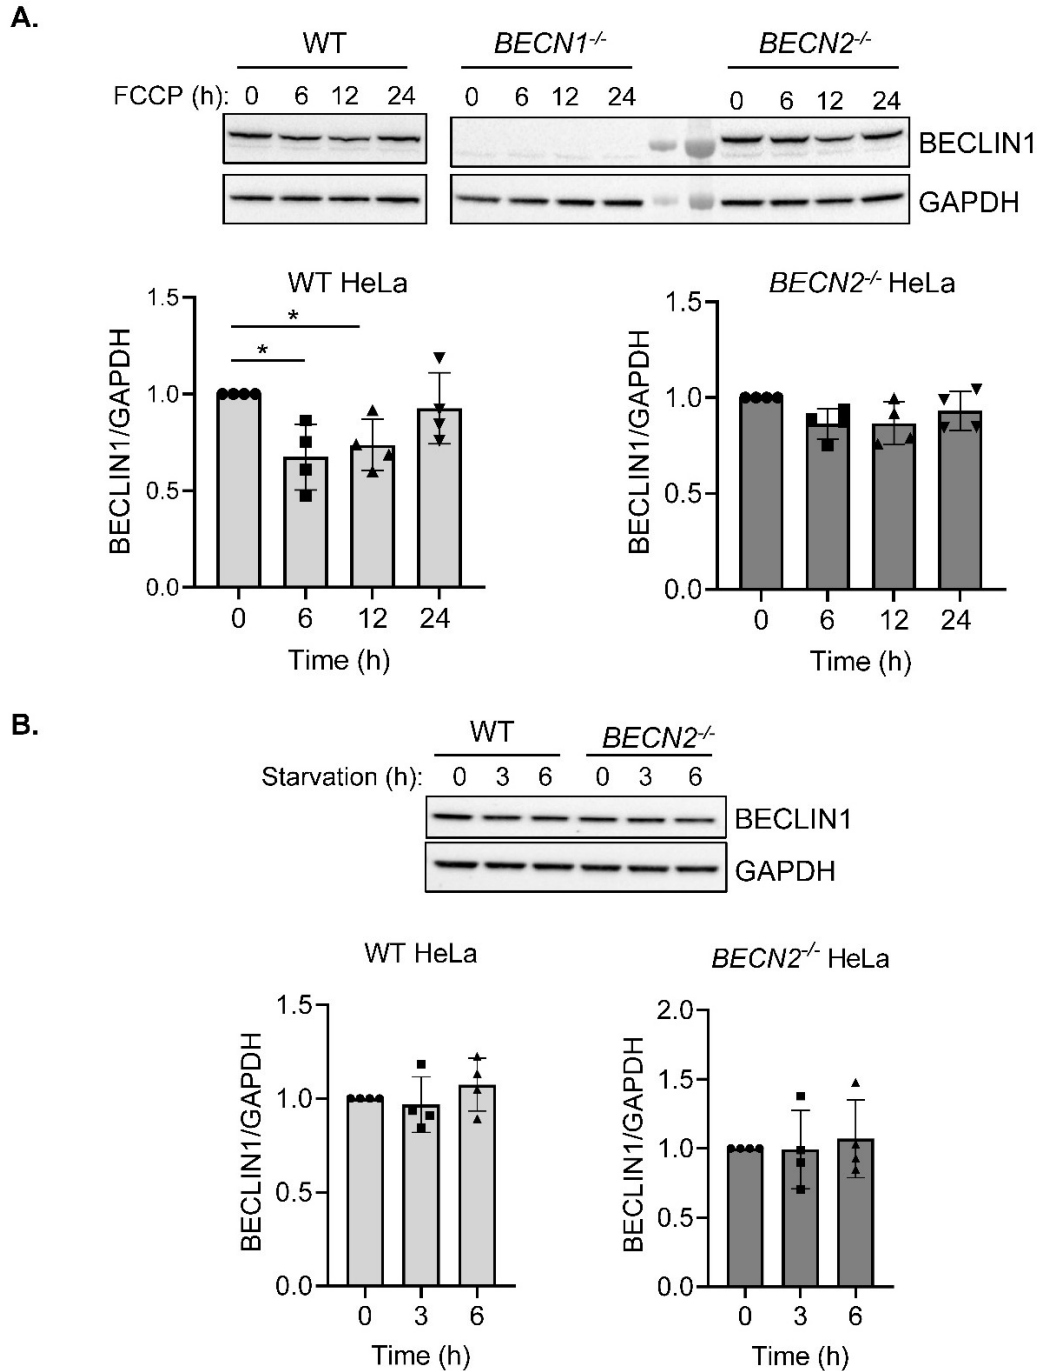

**Figure S4.** Beclin1 protein levels in HeLa cells after challenge. **A.** Representative Western blots and quantification of BECLIN1 protein levels in WT and *BECN2*<sup>-/-</sup> HeLa cells after exposure to 10  $\mu$ M FCCCP (n=4 independent experiments). **B.** Representative Western blots and quantification of BECLIN1 protein levels in WT and *BECN2*<sup>-/-</sup> HeLa cells after starvation (n=4 independent experiments). \*p<0.05 by one-way ANOVA followed by Tukey's multiple comparison test.

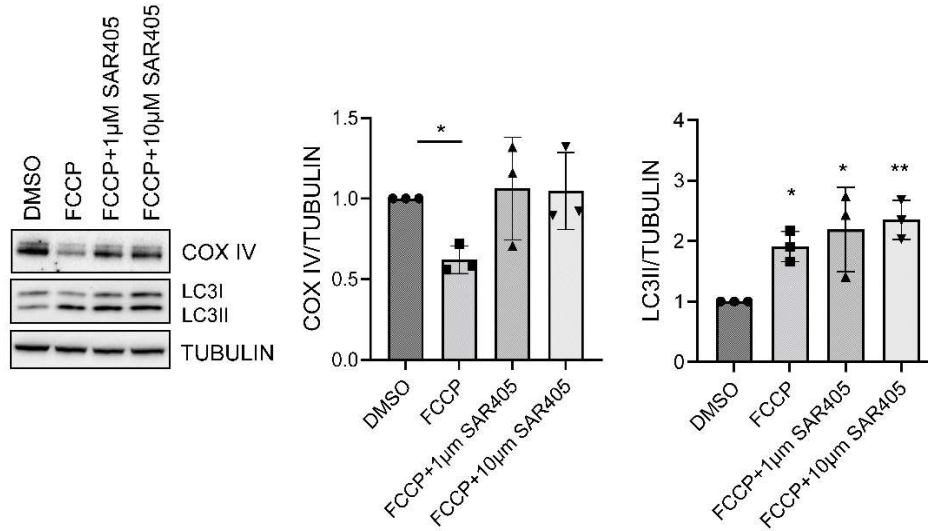

**Figure S5.** Vps34 inhibition and mitophagy in WT HeLa cells. Representative Western blot and quantification of COX IV and LC3II in WT HeLa cells treated with FCCP (10  $\mu$ M) in the presence or absence of SAR405 for 12h (n=3 independent experiments). \*p<0.05 and \*\*p<0.01 compared to DMSO by one-way ANOVA followed by Tukey's multiple comparison test. FCCP, carbonyl cyanide *p*-trifluoromethoxyphenylhydrazone.

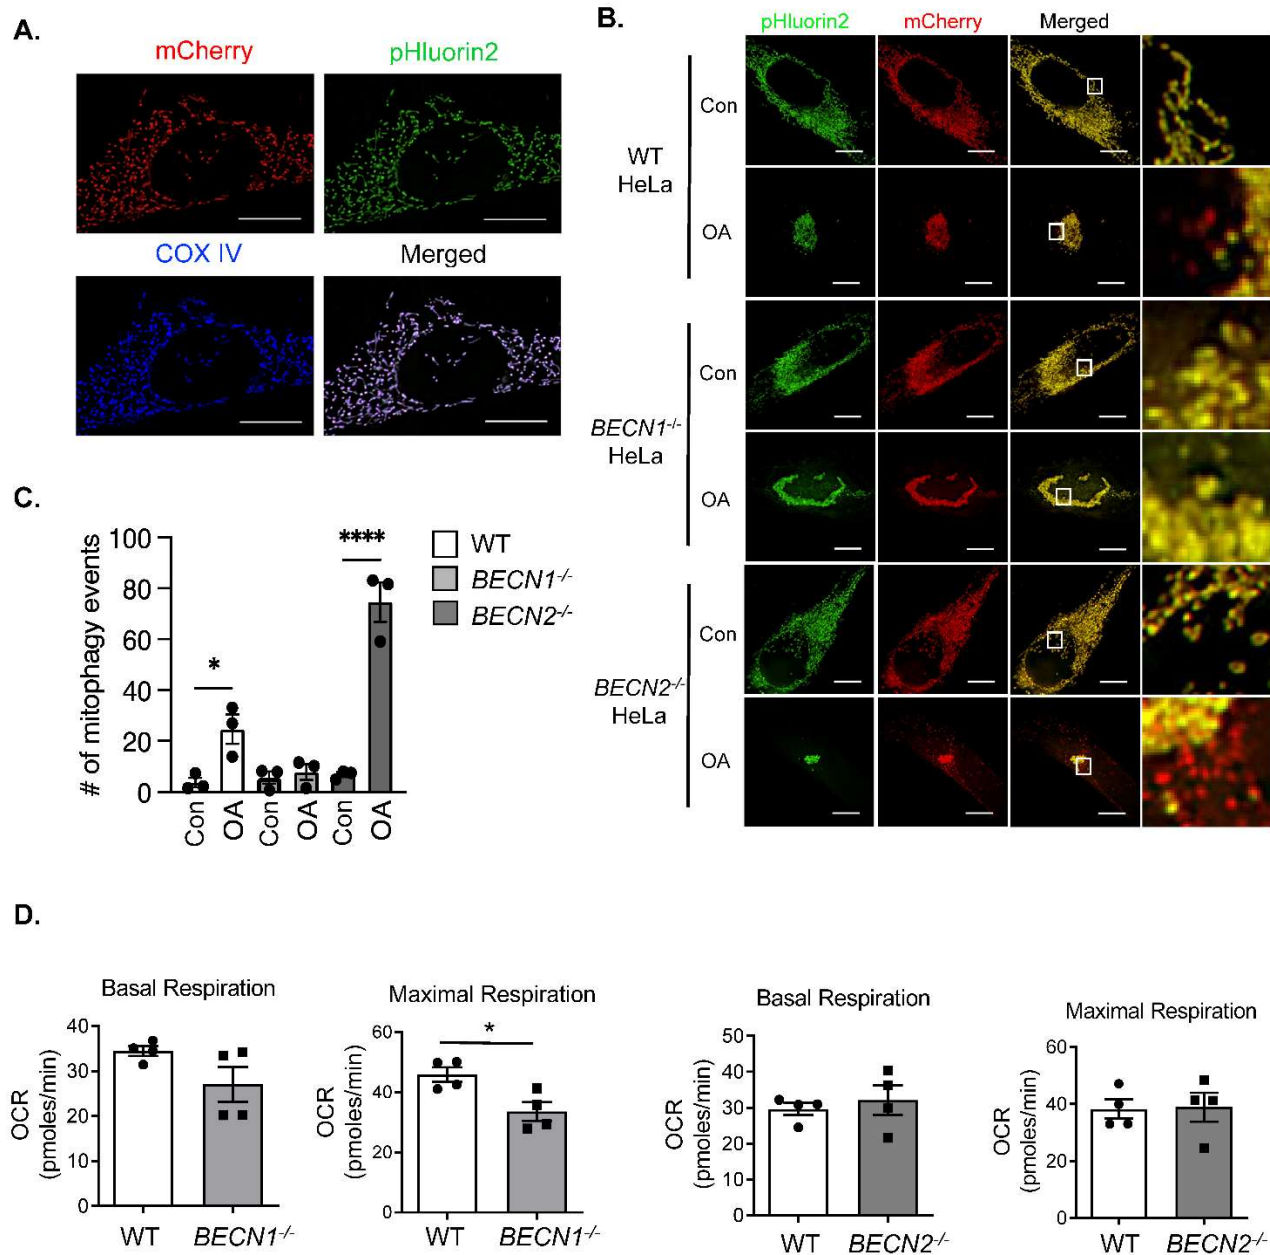

**Figure S6.** Mitophagy and mitochondrial respiration in WT, *BECN1*<sup>-/-</sup>, and *BECN2*<sup>-/-</sup> HeLa cells. **A.** Representative fluorescent image of WT MEFs overexpressing the MTS-mCherry-pHleurin2 mitophagy reporter. Cells are stained with anti-COX IV to label mitochondria. **B.** Representative images of WT, *BECN1*<sup>-/-</sup> and *BECN2*<sup>-/-</sup> HeLa cells overexpressing the mitophagy reporter before and after treatment with Oligomycin (4  $\mu$ M) plus Antimycin A (4  $\mu$ M) for 6h. **C.** Quantification of mitophagy events/cell (n=90 cells/group from 3 independent experiments). **D.** Mitochondrial respiration was measured in WT, *BECN1*<sup>-/-</sup>, and *BECN2*<sup>-/-</sup> HeLa cells using a Seahorse XFp analyzer. Basal and maximal oxygen consumption rates (OCR) were normalized to cell number (n=4 independent experiments). \*p<0.05 and \*\*\*\*p<0.0001 by one-way ANOVA followed by Tukey's multiple comparison test or Student's t-test. Scale bar = 10  $\mu$ m

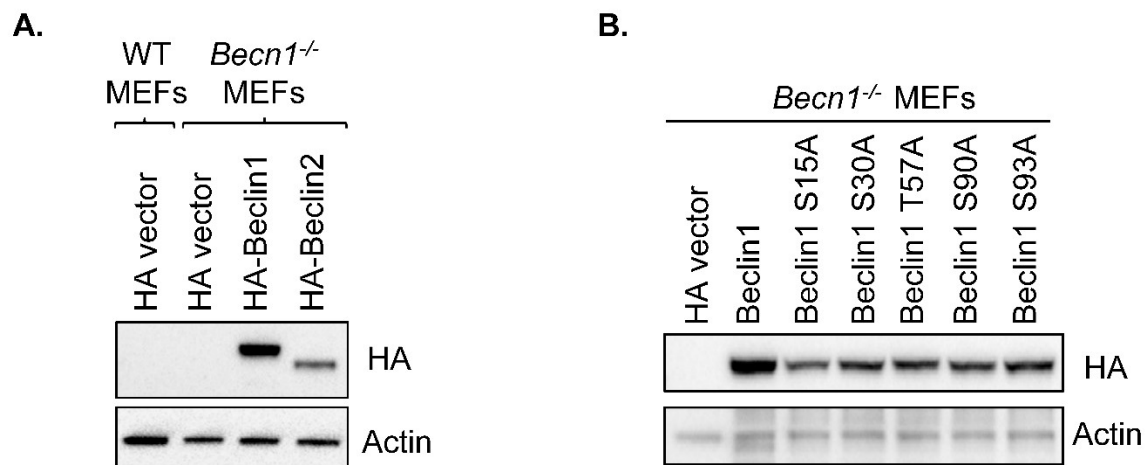

**Figure S7.** Expression of Beclin1 and mutant constructs in MEFs. **A.** Western blot confirming overexpression of HA-Beclin1 and HA-Beclin2 in transfected MEFs. **B.** Western blot confirming overexpression of the various HA-tagged mutants in *Becn1*<sup>-/-</sup> MEFs. Membranes were blotted with anti-HA. Actin was used as a loading control.



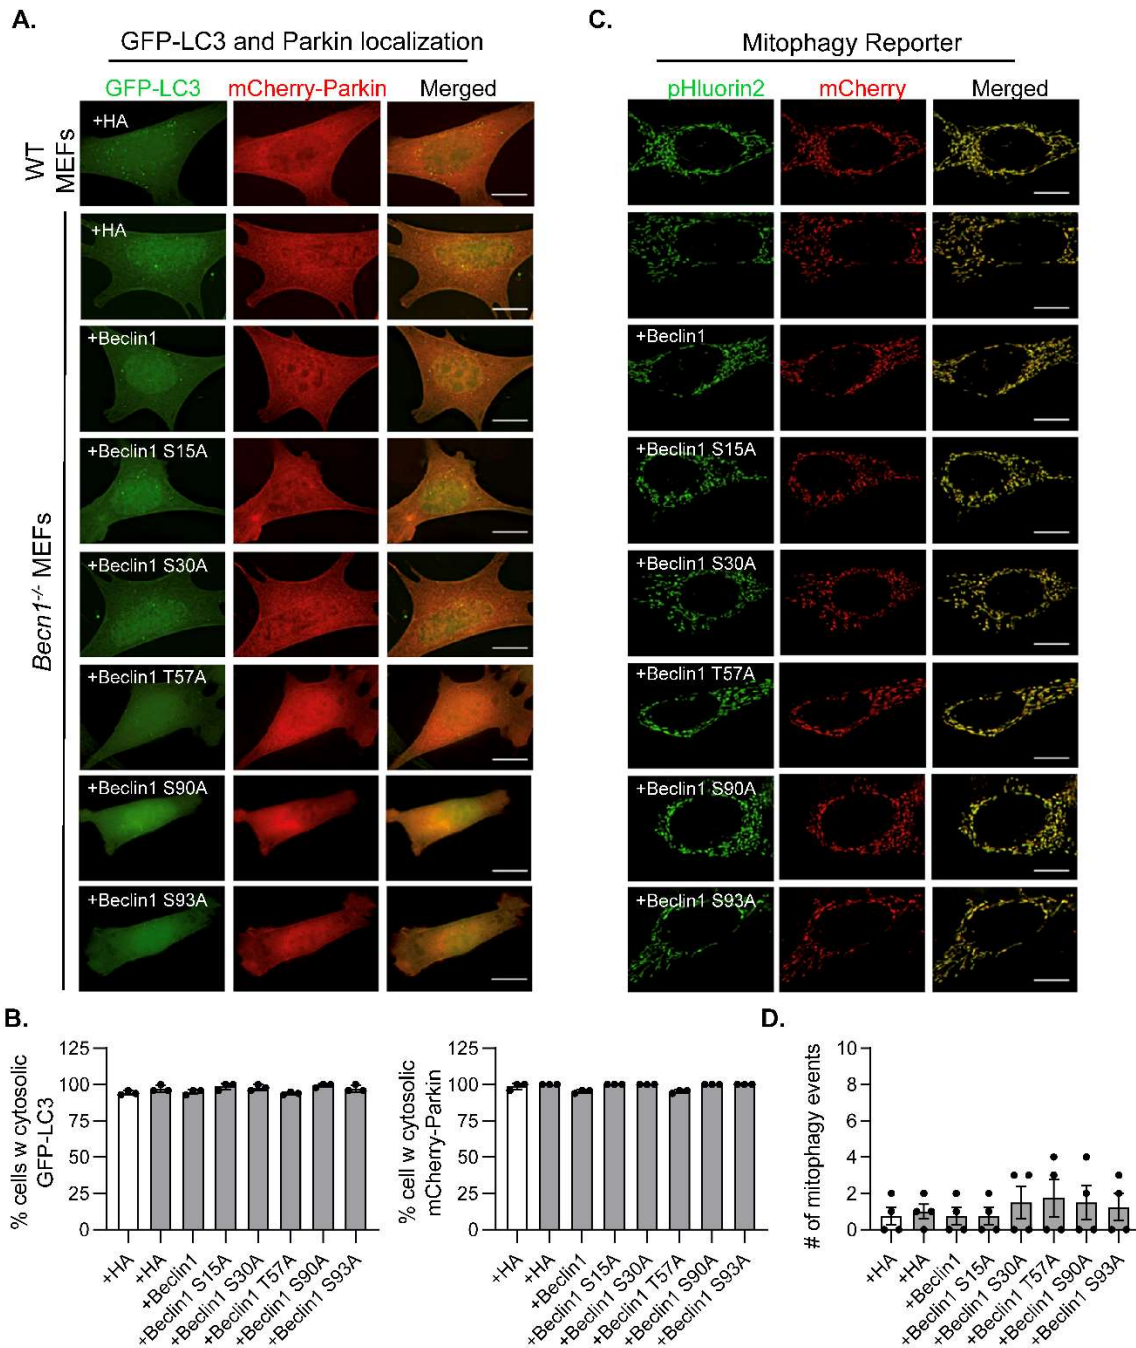

**Figure S8.** Cellular localization of GFP-LC3, mCherry-Parkin and mitophagy reporter in WT and *Becn1*<sup>-/-</sup> MEFs under baseline conditions. **A.** Representative images of WT and *Becn1*<sup>-/-</sup> MEFs overexpressing Beclin1 or Beclin1 phosphorylation resistant mutants plus GFP-LC3 and mCherry-Parkin under baseline conditions. **B.** Quantification of cells with cytosolic distribution (n=90 cells/group from 3 independent experiments). **C.** Representative images of WT and *Becn1*<sup>-/-</sup> MEFs overexpressing MTS-mCherry-pHluorin2 plus myc-Parkin, and Beclin1 or Beclin1 mutants at baseline. **D.** Quantification of mitophagy events at baseline (n=120 cells/group from 4 independent experiments). One-way ANOVA followed by Tukey's multiple comparison test. Scale bar = 10  $\mu$ m



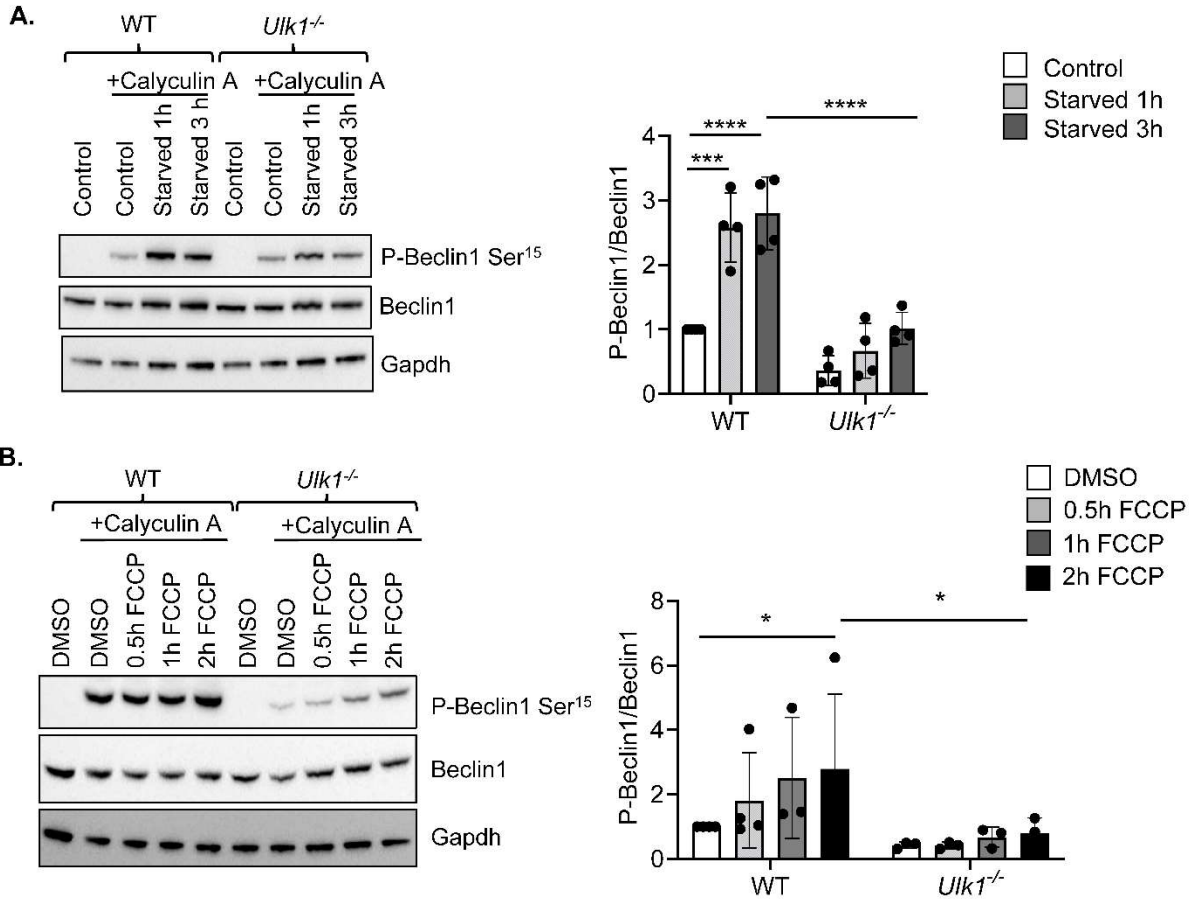

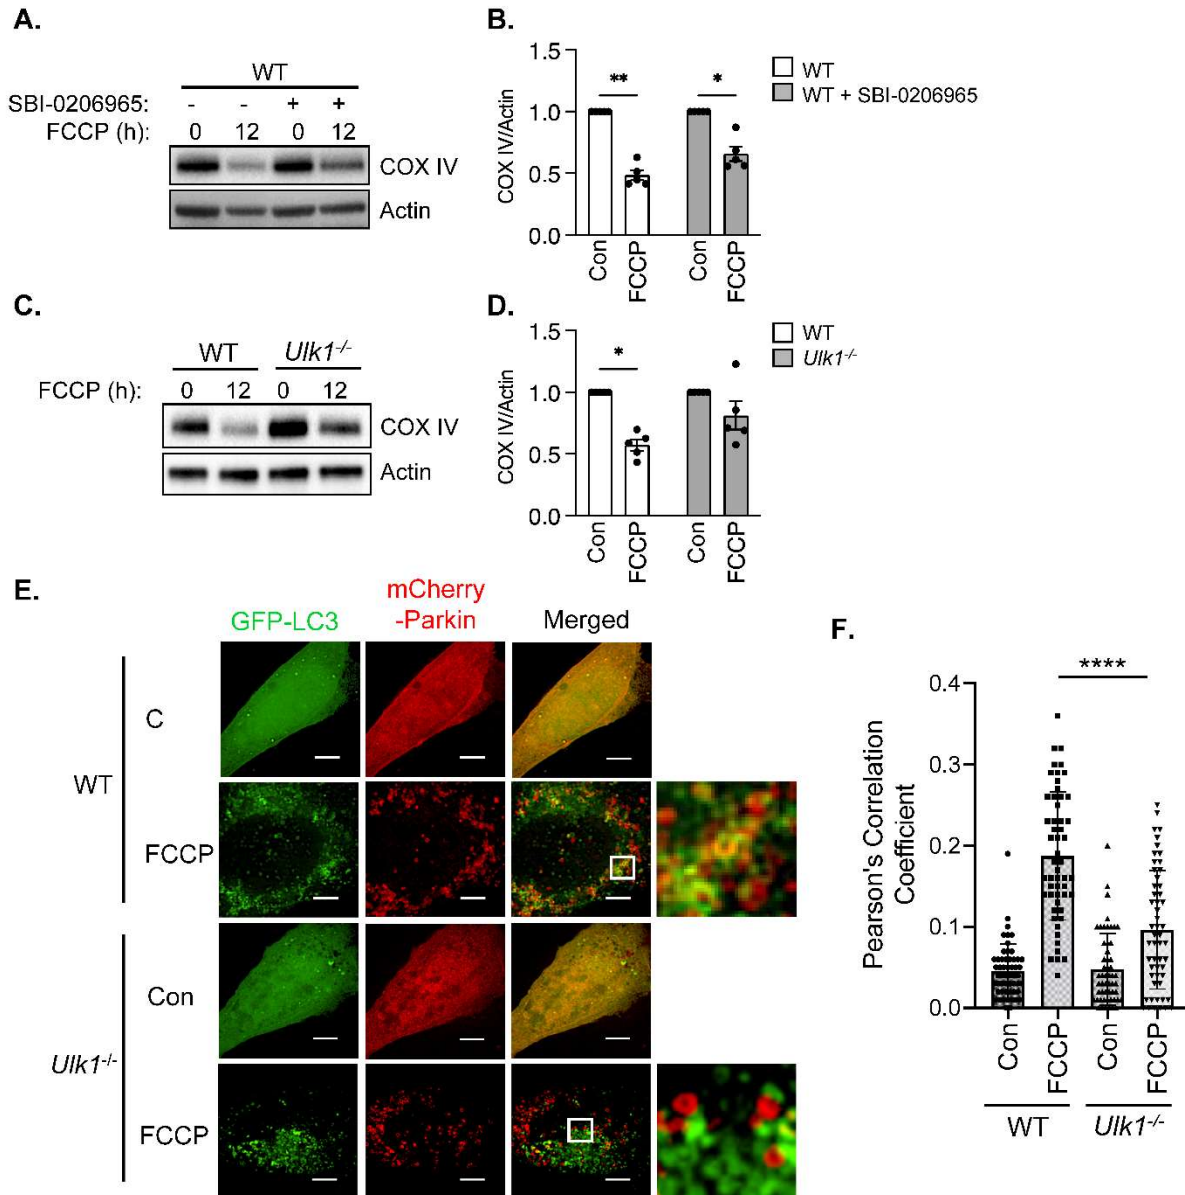

**Figure S10.** Effect of pharmacologic inhibition or genetic deletion of Ulk1 on mitophagy in MEFs. **A.** Representative Western blot for COX IV in WT MEFs. Cells were treated with the Ulk inhibitor SBI-0206965 (20  $\mu$ M) plus FCCP (10  $\mu$ M) for 12 hours. **B.** Quantification of COX IV protein levels (n=5 independent experiments). **C.** Representative Western blot for COX IV in WT and *Ulk1*<sup>-/-</sup> MEFs after treatment with 25  $\mu$ M FCCP (12h). **D.** Quantification of COX IV protein levels (n=5 independent experiments). **E.** Representative images of WT and *Ulk1*<sup>-/-</sup> MEFs overexpressing GFP-LC3 and mCherry-Parkin treated with 10  $\mu$ M FCCP for 6 hours. **F.** Quantification of colocalization between mCherry-Parkin and GFP-LC3 by Pearson's correlation coefficient (n=56 cells/group from 3 independent experiments). \*p<0.05, \*\*p<0.01, and \*\*\*\*p<0.0001 by two-way analysis of variance (ANOVA) followed by Tukey's multiple comparison test. Scale bar = 10  $\mu$ m

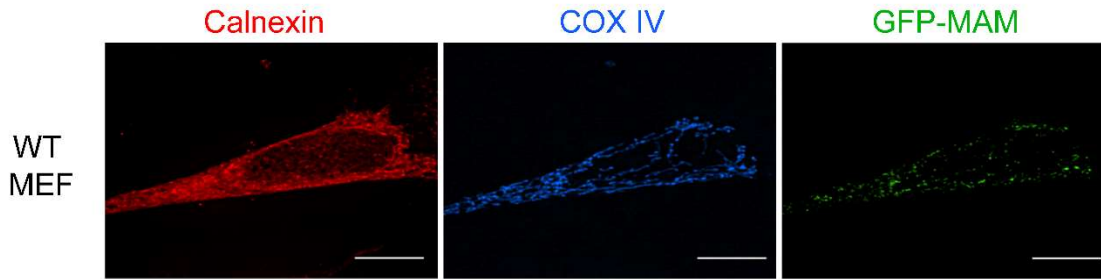

**Figure S11.** Expression of MAM reporter in WT MEFs. Representative fluorescent image of a WT MEF overexpressing the split GFP-MAM reporter (green). Cells were fixed and stained with anti-calnexin to label the endoplasmic reticulum (red) and anti-COX IV (blue) to label mitochondria. Scale bar = 10  $\mu$ m.

**Figure S12 – Uncropped Western blots**

Figure 1B

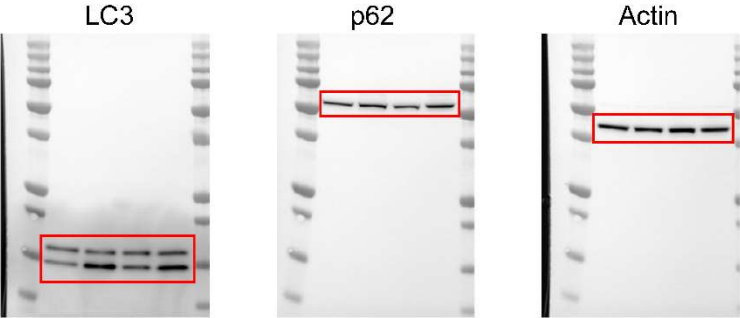

Figure 1E

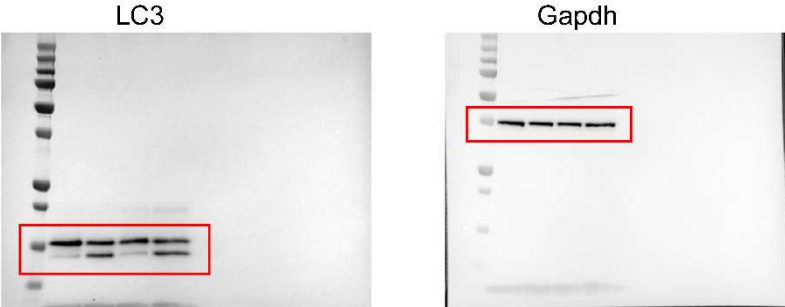

Figure 1H

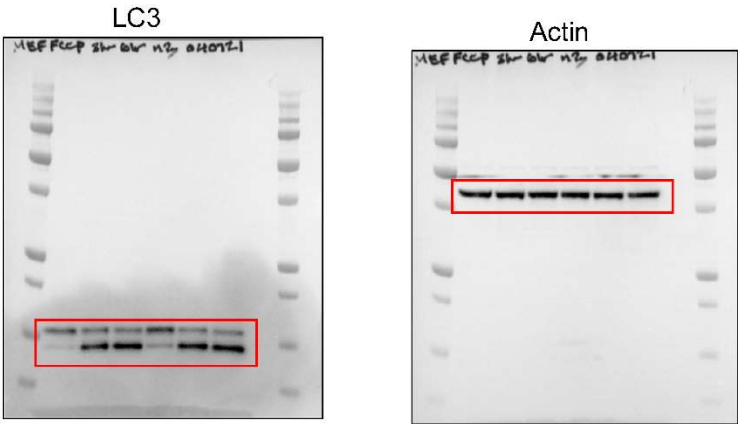

Figure 2B

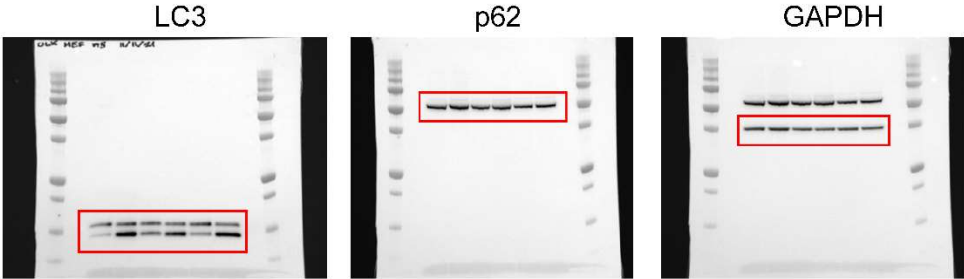

Figure 2E

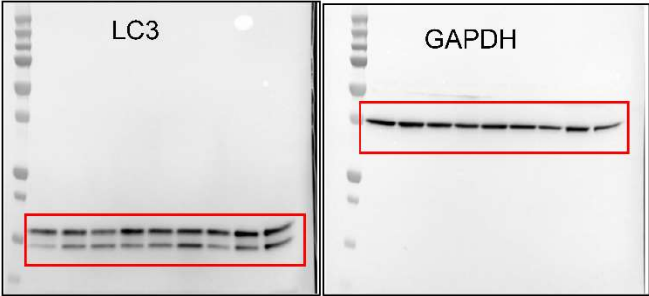

Figure 2H

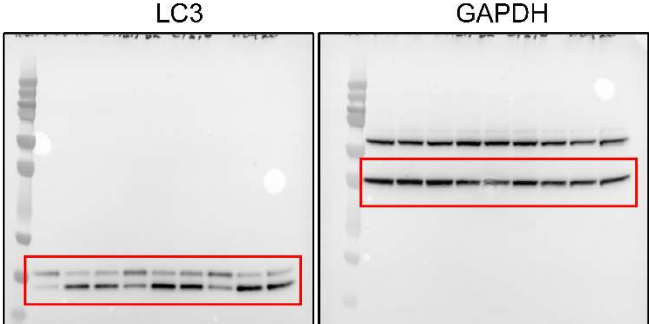

Figure 3C

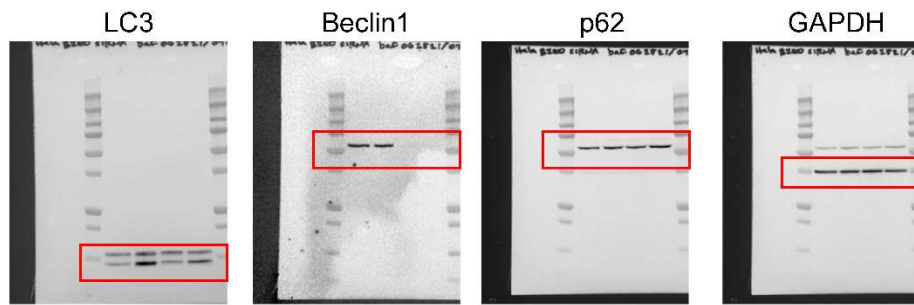

Figure 3E

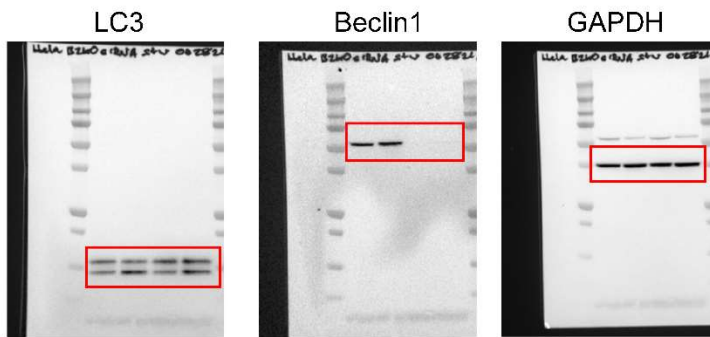

Figure 3G

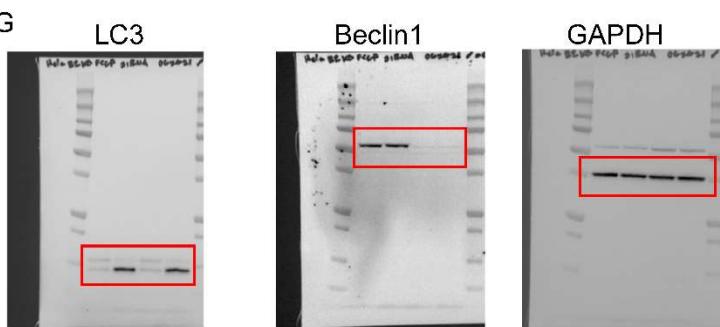

Figure 4D

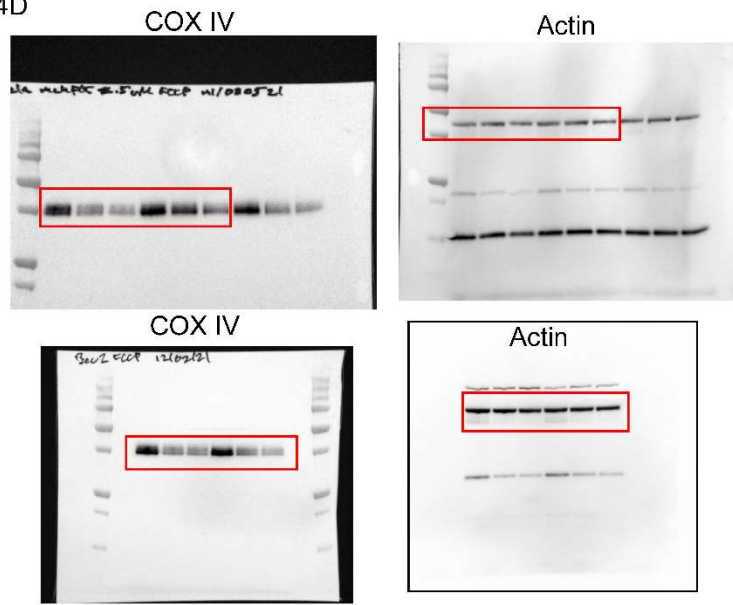

Figure 4G

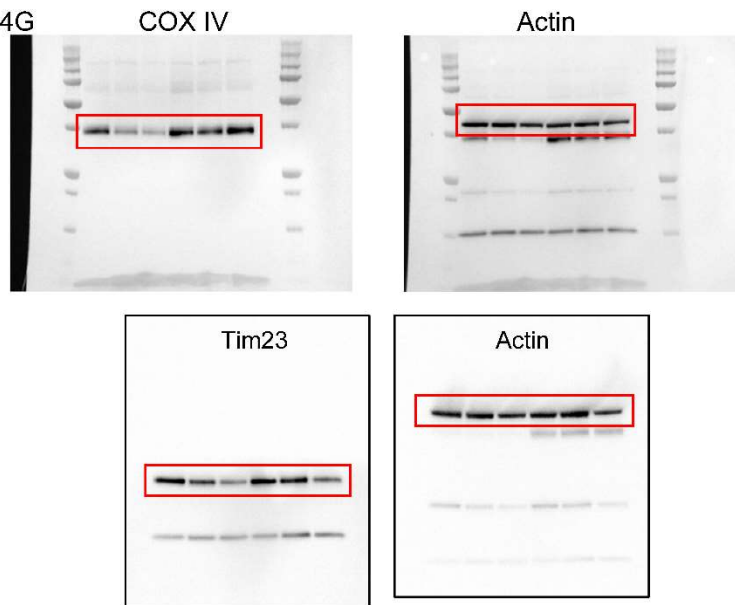

Figure 5C

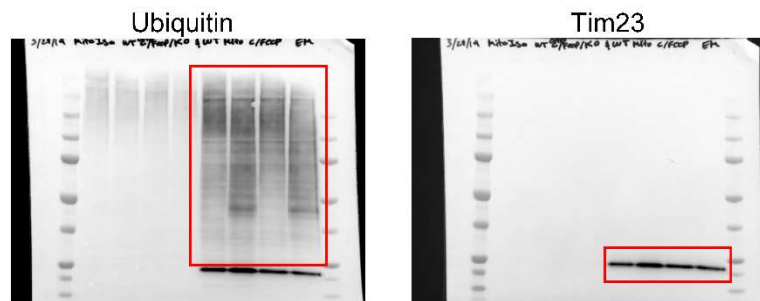

Supplement: NIHMS1875675-supplement-Supplemental_data.pdf [file NIHMS1875675-supplement-Supplemental_data.pdf]
